# A High Resolution Map of Meiotic Recombination in *Cryptococcus* Demonstrates Decreased Recombination in Unisexual Reproduction

Cullen Roth<sup>\*,†</sup>, Sheng Sun<sup>†</sup>, R. Blake Billmyre<sup>†</sup>, Joseph Heitman<sup>†</sup> and Paul M. Magwene<sup>\*,1</sup>

<sup>\*</sup>Department of Biology, Duke University, Durham, North Carolina, United States of America, <sup>†</sup>University Program in Genetics and Genomics, Duke University, Durham, North Carolina, United States of America, <sup>1</sup>Department of Molecular Genetics and Microbiology, Duke University Medical Center, Durham, North Carolina, United States of America

**ABSTRACT** Multiple species within the basidiomycete genus, *Cryptococcus*, cause cryptococcal disease. These species are estimated to affect nearly a quarter of a million people leading to approximately 180,000 mortalities, annually. Sexual reproduction, which can occur between haploid yeasts of the same or opposite mating type, is a potentially important contributor to pathogenesis as recombination can generate novel genotypes and transgressive phenotypes. However, our quantitative understanding of recombination in this clinically important yeast is limited. Here we describe genome-wide estimates of recombination rates in *Cryptococcus deneoformans* and compare recombination between progeny from  $\alpha$ - $\alpha$  unisexual and  $\mathbf{a}$ - $\alpha$  bisexual crosses. We find that offspring from bisexual crosses have modestly higher average rates of recombination than those derived from unisexual crosses. Recombination hot and cold spots across the *C. deneoformans* genome are also identified and are associated with increased GC content. Finally, we observed regions genome-wide with allele frequencies deviating from the expected parental ratio. These findings and observations advance our quantitative understanding of the genetic events that occur during sexual reproduction in *C. deneoformans*, and the impact that different forms of sexual reproduction are likely to have on genetic diversity in this important fungal pathogen.

**KEYWORDS** unisexual reproduction; whole-genome sequencing; genome-wide recombination map; crossover hot spots; allele segregation distortion

Annually, cryptococcal disease is estimated to affect more than 200,000 people worldwide, accounting for approximately 15% of AIDS-related mortalities (Rajasingham *et al.* 2017). While *Cryptococcus* species are preferentially haploid (Hull *et al.* 2002) and propagate primarily asexually, sexual reproduction and recombination have been demonstrated in both the laboratory and environment (Kwon-Chung 1975, 1976; Litvinseva *et al.* 2003; Lin *et al.* 2007; Hull *et al.* 2002). The sexual cycle in *Cryptococcus* has clinical relevance as sexual reproduction produces spores, which can serve as infectious propagules, that are readily aerosolized and inhaled by hosts (Giles *et al.* 2009; Velagapudi *et al.* 2009; Coelho *et al.* 2014). Furthermore, recombination during sex produces new genotypes, some of which

may display novel phenotypes linked to virulence, such as the ability of offspring to grow at higher temperatures than that of their parental strains (Sun *et al.* 2014). Thus, quantitatively characterizing recombination in *Cryptococcus* is a key step to developing a better understanding of the genetics of virulence in this clade.

*Cryptococcus deneoformans* (formerly *C. neoformans* var. *neoformans* (serotype D), see Hagen *et al.* (2015) and Kwon-Chung *et al.* (2017) for recent discussions of nomenclature) possesses a bipolar mating system with the mating type locus (*MAT*) on the fourth chromosome. The *MAT* locus, which is greater than 100 kb in size and contains more than 20 genes, is represented in two mating type alleles,  $\alpha$  and  $\mathbf{a}$  (Heitman *et al.* 1999; Lengeler *et al.* 2002; Loftus *et al.* 2005; Sun and Heitman 2016). In the laboratory setting, sexual reproduction has been observed between haploid *MAT* $\alpha$  and *MAT* $\mathbf{a}$  strains (Kwon-Chung 1976; Hull *et al.* 2002; Xue *et al.* 2007; Nielsen *et al.* 2007; Sun *et al.* 2014; Gyawali *et al.* 2017). Diploid strains and signatures of re-

combination have been documented in environmental isolates, indicating that sexual reproduction also occurs in nature (Litvinseva *et al.* 2003; Campbell *et al.* 2005; Lin *et al.* 2007; Bui *et al.* 2008; Lin *et al.* 2009). However, an analysis of environmental and clinical isolates of *Cryptococcus* species revealed a bias in the distribution of the mating type alleles, with the majority of *C. deneoformans* isolates analyzed possessing the *MAT $\alpha$*  allele (Kwon-Chung and Bennett 1978). This observation called into question the frequency and importance of bisexual reproduction, and thus recombination, in the wild. Lin *et al.* (2009) provided an answer to this conundrum with the discovery that *C. deneoformans* is also capable of undergoing same sex or unisexual matings between *MAT $\alpha$*  strains (Lin *et al.* 2005, 2007, 2009).

Meiosis is an integral component of sexual reproduction (Page and Hawley 2003) that occurs in both unisexual and bisexual reproduction (Feretzi and Heitman 2013). Within a basidium, meiosis produces nuclei that will undergo several rounds of mitosis to generate subsequent nuclei that are packaged into spores (Kwon-Chung 1980). These basidiospores then bud from the basidium in four long chains (Kwon-Chung 1980; Idnurm 2010). Dissection of basidiospore chains and analysis of their genotypes shows segregation of alleles consistent with one round of meiosis and demonstrates that post-meiotic nuclei undergo mitosis and randomly assort into different spore chains (Kwon-Chung 1980; Idnurm 2010).

Various studies have examined recombination rates in *Cryptococcus* species, as well other phenomena that occur during meiosis, such as crossover hot spots, gene conversions, and allele segregation distortion (Forche *et al.* 2000; Marra *et al.* 2004; Hsueh *et al.* 2006; Sun and Xu 2007; Sun *et al.* 2014; Sun and Heitman 2016). Genome-wide, our quantitative understanding of recombination is limited to a few studies of *C. deneoformans* crosses (Forche *et al.* 2000; Marra *et al.* 2004) and hybrid crosses, between *C. deneoformans* and *C. neoformans* strains (Sun and Xu 2007). Current estimates of recombination rates for *C. deneoformans* are based on linkage maps constructed via a modest number of genetic markers, with estimates varying between 13.2 kb/cM (Marra *et al.* 2004) and 7.13 kb/cM (Sun *et al.* 2014), with no observed difference in recombination rates between progeny derived from unisexual versus bisexual reproduction (Sun *et al.* 2014).

In the present study we utilize whole genome sequencing data to quantitatively analyze differences in genome-wide recombination rates between progeny from unisexual and bisexual reproduction, to identify recombination hot and cold spots, and to identify chromosomal regions that exhibit biased or distorted allele frequencies. We find genome-wide differences in the average rates of recombination between progeny from  $\alpha$ - $\alpha$  unisexual and **a**- $\alpha$  bisexual crosses, with higher rates of crossovers in samples from **a**- $\alpha$  bisexual crosses. Recombination hot and cold spots are identified, with hot spots associated with higher than average GC content, and cold spots clustering near centromeres. Centromeric cold spots are often flanked by areas of increased crossover activity. Finally, we show that regions with allele frequencies deviating from the expected 2:2 parental allele ratio are not unique to chromosome four and are seen genome-wide. The high resolution characterization of patterns and rates of recombination that this study provides helps to advance our understanding of the processes that generate genetic diversity in this fungus, and will serve as a foundation for future investigations of the population and quantitative genetics of *C. deneoformans* and related *Cryptococcus* species.

## Materials and Methods

### Strains, laboratory crosses and isolation

As previously described (Sun *et al.* 2012, 2014), parental strains XL280a, XL280 $\alpha$ SS, and 431 $\alpha$ , were used in **a**- $\alpha$  bisexual and  $\alpha$ - $\alpha$  unisexual crosses. XL280 $\alpha$ SS is an XL280 $\alpha$  strain with an ectopically inserted *NAT* resistance marker in the *URA5* gene and congenic to XL280a with the exceptions of the *URA5* and *MAT* loci. Inverse PCR conducted on the XL280 $\alpha$ SS strain confirmed the insertion site of the *NAT* resistance marker within the *URA5* gene. For **a**- $\alpha$  bisexual crosses between strains XL280a and 431 $\alpha$ , chains of basidiospores from individual basidia were transferred onto fresh YPD medium, and individual basidiospores were separated using a fiber optic needle (Sun *et al.* 2014). From  $\alpha$ - $\alpha$  unisexual crosses between XL280 $\alpha$ SS and 431 $\alpha$ , recombinant progeny were generated using selectable markers to isolate *NAT<sup>R</sup>URA<sup>+</sup>* progeny (Sun *et al.* 2014).

### Sequencing, aligning, variant calling and filtering

From the  $\alpha$ - $\alpha$  unisexual and the **a**- $\alpha$  bisexual crosses, 105 segregants were isolated for whole genome sequencing (Sun *et al.* 2014). Sequencing was performed on the Illumina HiSeq 2500 platform at the University of North Carolina Chapel Hill Next Generation Sequencing Facility. A paired end library with approximately 300 base inserts was constructed for each sample, and libraries were multiplexed and run 24 samples per lane using 100 bp paired-end reads. Raw reads were aligned to an XL280 *C. deneoformans* reference genome (McKenna *et al.* 2010; Sun *et al.* 2014) using BWA (v0.7.10-r789, Li and Durbin 2009). Variant calling was carried out using The Genome Analysis Toolkit (v3.1-1, McKenna *et al.* 2010) and SAMtools (v1.2, Li 2011) resulting in 143,812 variable sites across the 105 segregants. These sites were scored as 0 or 1 if inherited from the XL280 $\alpha$ SS (or XL280a) or the 431 $\alpha$  parental strains, respectively. Variable sites were filtered on read depth and quality. Across segregants, variable sites were required to have greater than 15 $\times$  coverage, a quality score, normalized by read depth, of greater than or equal to 20, and a minor allele frequency per site of at least 1%. Only sites with 100% call rate were used in analysis. Variant calls were further filtered to include only sites exhibiting biallelic, single nucleotide polymorphisms, yielding a final total of 86,767 sites.

### Segregant filtering

Read count data for each SNP site was used to screen each of the 108 segregants for gross aneuploidy of chromosomes. In total six segregants were removed due to partial or complete aneuploidy. Aneuploidy of chromosome one was detected in three segregants, a duplication of the right arm of chromosome seven in one segregant, and aneuploidy of chromosome ten in two segregants. For all samples pairwise genetic correlations were calculated to identify pairs of segregants that were genetically identical. These duplicates were removed from analysis to avoid biasing estimates of recombination by sampling a genotype more than once. In total, four pairs of segregants were identified as genetically identical. From each of the four pairs of segregants, one was removed from analysis. One segregant from the **a**- $\alpha$  bisexual cross, SSB593, showed no recombination across the genome except on chromosome four. All of the other chromosomes in the segregant were inherited from the XL280a parental strain. This segregant was removed from further analysis. After passing these filtering criteria, 94 segregants, 55 from

167  $\alpha$ - $\alpha$  unisexual crosses and 39 from  $\mathbf{a}$ - $\alpha$  bisexual crosses, were re- 225  
168 tained for analysis. 226

### 169 **Haplotype construction and filtering**

170 For each sample, SNP data was used to estimate regions with 229  
171 consecutive SNPs inherited from one parent (i.e haplotypes) 230  
172 between XL280 $\mathbf{a}$ , XL280 $\alpha$ SS, and 431 $\alpha$ . A “minimum” run ap- 231  
173 proach based on inter-marker intervals was used to determine 232  
174 the size of haplotypes (Mancera *et al.* 2008). Briefly, for a set of 233  
175 SNPs within a haplotype with positions  $v_0, v_1, \dots, v_n$  along a chro- 234  
176 mosome, the size of the haplotype in nucleotide bases or length 235  
177 of the intra-marker interval is calculated as  $h = v_n - v_0 + 1$ . 236  
178 The inter-marker interval is defined as the distance between 237  
179 two SNPs with opposing genotypes (Mancera *et al.* 2008). Let 238  
180  $v, w$  be the positions of two adjacent SNPs along a chromo- 239  
181 some with opposing genotypes, then the distance in nucleotide 240  
182 bases between the two SNPs is calculated as  $d = w - v - 1$ . 241  
183 For each sample, SNP data was used to construct haplotype 242  
184 blocks, where runs of contiguous SNPs with shared genotypes 243  
185 are grouped. For the results shown here, haplotypes were re- 244  
186 tained if the size of the haplotype or intra-marker interval was 245  
187 greater than or equal to 6 kb. 246

### 188 **Crossover frequency estimation**

189 **Poisson regression:** Haplotype data for each segregant was 247  
190 used to calculate the number of crossovers. For any given seg- 248  
191 regant with  $n$  haplotypes there are  $n - 1$  crossovers. Genome- 249  
192 wide recombination rates were estimated using Poisson regres- 250  
193 sion, modeling the number of crossovers as a function of chro- 251  
194 mosome length with the mode of sexual reproduction as a co- 252  
195 variate using the “glm” function implemented in R (version 253  
196 3.4.1). Our analysis indicated no support for an interaction 254  
197 term between chromosome length and mode of sexual repro- 255  
198 duction; we therefore fit a simple additive model of the form 256  
199  $\log(E(\# \text{ of crossovers} \mid \mathbf{x})) = \beta_0 + \beta_1 \mathbf{I}_c + \beta_2 \mathbf{x}$ , where  $\mathbf{x}$  is chro- 257  
200 mosome length and  $\mathbf{I}_c$  is an indicator variable for the cross type 258  
201 ( $0 = \alpha$ - $\alpha$  unisexual,  $1 = \mathbf{a}$ - $\alpha$  bisexual crosses). 259

202 The model was estimated as:  $\log(E(\# \text{ of crossovers} \mid \mathbf{x})) =$  260  
203  $-0.015 + 0.274 \mathbf{I}_c + 0.570 \mathbf{x}$ . The model fit failed to reject the null 261  
204 hypothesis of a zero intercept term ( $B_0$ ) but there was strong 262  
205 support to reject the null hypothesis of zero valued  $\beta_1$  and  $\beta_2$  263  
206 coefficients (p-values  $< 10^{-10}$ ). 264

207 **Analysis of crossovers per chromosome:** For each chromo- 265  
208 some, the number of crossovers was compared between seg- 266  
209 regants from the  $\alpha$ - $\alpha$  unisexual and  $\mathbf{a}$ - $\alpha$  bisexual crosses. A 267  
210 two sided, Mann-Whitney U-test with an  $\alpha = 0.05$  was uti- 268  
211 lized to test for significant differences in the average number of 269  
212 crossovers (per chromosome) along with the Holm-Sidak step 270  
213 down method to correct for multiple testing (Holm 1979). 271

### 214 **Crossover hot and cold Spot discovery and analysis**

215 **Statistical association testing:** For each chromosome, contig- 272  
216 uous bins of 41.5 kb were constructed, tiling each chromosome 273  
217 from the edges of the centromeres out to the ends of the chromo- 274  
218 some (centromeric regions were excluded from hot/cold spot 275  
219 analysis). After investigating the total detected number of hot 276  
220 and cold crossover spots as a function of bin size (from 0.5 277  
221 to 100 kb), a bin size of 41.5 kb was chosen because it mini- 278  
222 mized the difference between the detected number of crossover 279  
223 hot spots and crossover cold spots. The outermost 5' and 3' 280  
224 bins of each chromosome were constructed to have at least half 281

222 of their width overlap the last two annotated SNP on the re- 223  
224 spected end of that chromosome. Within each bin, the num- 225  
226 ber of inter-marker intervals in which a crossover was detected 227  
228 were counted. For each inter-marker interval, crossovers shared 229  
230 by meiotic siblings were only counted once. For every bin, 231  
232 a Poisson model, with parameters established from genome- 233  
234 wide analysis of crossover frequencies of meiotic progeny from 235  
236 the  $\mathbf{a}$ - $\alpha$  bisexual crosses, was utilized to compare the number of 237  
238 crossovers observed versus the number expected given the bin 239  
240 size. A two-tailed test was used to search for statistically cold 241  
242 and hot crossover spots. A false discovery rate approach (Ben- 243  
244 jamini and Yekutieli 2001) was used to define genome-wide, sig- 244  
245 nificantly hot or cold crossover spots, using at a false-discovery 245  
246 rate cutoff of 0.05. An “artificial” hot spot on chromosome 246  
247 seven, resulting from the use of selectable markers to isolate 247  
248 recombinant progeny from the  $\alpha$ - $\alpha$  unisexual crosses (Sun *et al.* 248  
249 2012, 2014), was removed from the analysis. 249

250 **Analysis of GC content:** For each inter-marker interval, nu- 251  
252 cleotide sequences were obtained from the XL280 reference 252  
253 genome. The GC content for all inter-marker intervals was 253  
254 calculated and classified as hot, cold, or other according to 254  
255 whether the interval fell within a hot or cold region as defined 255  
256 above. In total there were 7,558 hot inter-marker interval se- 256  
257 quences, 7,369 cold spot inter-marker interval sequences, and 257  
258 68,051 intervals defined as other. The GC content for inter- 258  
259 marker intervals within hot and cold spots was compared us- 259  
260 ing a two-sided, Mann-Whitney U test ( $\alpha = 0.05$ ). For the three 260  
261 groups of inter-marker interval sequences, 95% confidence in- 261  
262 tervals were calculated via permutation (sampling with replace- 262  
263 ment), taking the difference between the observed mean GC 263  
264 content and the sampled mean, 1,000 times. From these devi- 264  
265 ations, the 2.5% and 97.5% percentiles of the permuted distribu- 265  
266 tion were used as critical values. 266

### 258 **Identification of motifs associated with crossover hot spot**

259 **sequences:** To search for sequence motifs associated with hot 267  
260 spots, 100 random sequences from hot spot inter-marker inter- 268  
261 vals in which there was a crossover were chosen such that the 269  
262 lengths of sequences ranged between 100 and 10,000 bases and 270  
263 the sum of the sequences was less than 60 kb (constraints re- 271  
264 lated to the online MEME tool). A complementary control set 272  
265 of 100 randomly chosen sequences were selected from other ge- 273  
266 nomic regions using the same parameters. The hot and control 274  
267 sets of sequences were analyzed using MEME, version 4.12.0 275  
268 (Bailey *et al.* 1994). Analysis in MEME was conducted using dis- 276  
269 criminative mode, with zero or one occurrence of a contribut- 277  
270 ing motif site per sequence, searching for four motifs between 278  
271 six and 50 bases wide. 279

### 272 **Analysis of allele distortion and bias**

273 **Segregants used in haplotype analysis:** From the  $\mathbf{a}$ - $\alpha$  bisexual 274  
275 cross, 22 of the 39 segregants were grouped by basidium, rep- 275  
276 resenting five unique basidia. Basidia groups were chosen for 276  
277 analysis if they contained three or more segregants with unique 277  
278 genotypes. Of the five basidia groups, two consisted of three 278  
279 segregants, two with four segregants, and one basidium exhib- 279  
280 ited eight unique genotypes. 280

281 **Analysis of haplotypes with distorted allele frequencies:** The 281  
282 allele frequency of haplotypes across segregants germinated 282  
283 from the same basidia was analyzed. Specifically, deviations 283  
284 from the expected 2:2 parental allele ratio were quantified. Re- 284  
285 gions were removed from consideration if only a single SNP



supported the observation or if the size of the region was only one base in width. An ANOVA was used to examine average differences in size of haplotypes with distorted allele frequencies across the genome. A log-linear model was used to investigate the average number of haplotypes as a function of chromosome size ( $\alpha = 0.05$ ).

**Analysis of allele bias:** Across all the 39 segregants from the  $\alpha$ - $\alpha$  bisexual crosses, a binomial model was used to identify chromosomal regions with bias towards one parental allele. This model assumed equal likelihood for inheriting either of the parental alleles ( $p = 0.50$ ). SNP sites were collapsed across the 39 segregants based on recombination break points and common allele frequencies. This generated 944 sites to test in the binomial model. A false discovery rate approach  $\text{fdr} = 0.05$  was used to correct for multiple comparisons. A similar procedure was used for testing for allele bias in the  $\alpha$ - $\alpha$  unisexual cross.

### Data availability

Raw sequence reads generated from samples utilized in this study are available on NCBI's sequence read archive under BioProject identification number PRJNA420966, with individual accession numbers SAMN08130857 – SAMN08130963. The generated variant call file from the aligned sequenced reads are publicly available on the GitHub repository <https://github.com/magwenelab/crypto-recombination-paper>.

## Results

### High density SNP data allows fine mapping of genome-wide crossovers

Whole genome sequencing data was obtained for 55 segregants from  $\alpha$ - $\alpha$  unisexual crosses between parental strains XL280 $\alpha$ SS and 431 $\alpha$  and 39 segregants from  $\alpha$ - $\alpha$  bisexual crosses between the parental strains XL280a and 431 $\alpha$  (Sun *et al.* 2014). Variants were called for each segregant (see *Materials and Methods*) and 86,767 biallelic, single nucleotide polymorphisms (SNPs) between the parental strains were used as genetic markers. Across the 19 Mb genome, comprised of fourteen chromosomes, the median distance between consecutive SNPs (inter-marker interval) was 87 bases with only 0.5% of the 86,753 inter-marker intervals larger than 2 kb (Supplementary Figure S1). SNP data was used to infer haplotypes and crossover events per segregant (Figure 1). In total 3,301 crossovers were detected.

In each set of progeny from the  $\alpha$ - $\alpha$  unisexual and  $\alpha$ - $\alpha$  bisexual crosses, several segregants were identified as having at least one non-exchange chromosome. In 35 of 55 (64%) progeny from the  $\alpha$ - $\alpha$  unisexual crosses and 19 of 39 (49%) progeny from the  $\alpha$ - $\alpha$  bisexual crosses, at least one chromosome was non-recombinant based on filtered SNP data and inferred haplotypes. There is no difference in the distributions of number of non-exchange chromosomes per segregants across the two cross types ( $\text{ks-test}$ ,  $p\text{-value} > 0.05$ ). For these progeny, the median number of non-exchange chromosomes per segregant is between one and five. Smaller chromosomes are more likely to have zero crossovers. Of the 59 non-exchange chromosomes in the 35 progeny from the unisexual crosses, 32 (54%) have the parental XL280 $\alpha$ SS genotype. However, in the 37 non-exchange chromosomes among the 19 progeny from the bisexual crosses, 29 (78%) have the XL280a parental copy.

### Genome-wide recombination rates differ between unisexual and bisexual reproduction in *C. deneoformans*

Genome wide recombination rates were estimated using Poisson regression, modeling the number of crossovers as a function of chromosome length with the mode of sexual reproduction as a covariate (see *Materials and Methods*). This model predicts an obligatory  $\sim 0.98$  crossovers per chromosome for offspring from the unisexual crosses and  $\sim 1.30$  crossovers per chromosome for offspring of the bisexual cross. There is a significant difference in the expected number of crossovers between segregants from  $\alpha$ - $\alpha$  unisexual and  $\alpha$ - $\alpha$  bisexual crosses ( $p\text{-value} < 10^{-10}$ ). The expected number of crossovers is predicted to increase by a ratio of  $\sim 1.768$  per Mb increase in chromosome size (Figure 2). Based on the sum of the per chromosome average and the total genome length, we estimate an approximate physical to genetic distance of 6.14 kb/cM for the  $\alpha$ - $\alpha$  unisexual crosses and 4.67 kb/cM for the  $\alpha$ - $\alpha$  bisexual crosses.

To explore this difference in greater detail, we compared recombination rates by chromosome for the two types of crosses. For chromosomes 1 – 5, 8, and 9 there are significant differences (Mann-Whitney U-test,  $q\text{-values} < 0.042$ ) in the average number of detected crossovers between the progeny from the  $\alpha$ - $\alpha$  unisexual and  $\alpha$ - $\alpha$  bisexual crosses. No significant difference in the average number of crossovers between the two cross types was detected on chromosomes 6, 7, and 10 – 14 (Supplementary Figure S2).

### Analysis of crossover hot spots for segregants from $\alpha$ - $\alpha$ unisexual and $\alpha$ - $\alpha$ bisexual crosses in *C. deneoformans*

To identify crossover hot and cold spots along each chromosome, a binning approach was used. Bins of size 41.5 kb were tiled across each chromosome, and the number of crossovers detected within each bin was counted. The bin size of 41.5 kb was chosen based on simulations, so as to minimize the difference in the total number of hot and cold spots (see *Materials and Methods*). A Poisson model with this bin size and the expected genome-wide average crossover rate per segregant as estimated from the observed data (see *Materials and Methods*), was used in two tail tests to examine each bin for significantly high (hot) or low (cold) crossover rates. A false discovery rate procedure was used to establish genome-wide significance ( $\alpha = 0.025$ ,  $q\text{-values} < 0.014$ ) (Benjamini and Yekutieli 2001). This analysis revealed 39 hot spots, bins with 20 or more detected crossovers, and 44 cold spots, bins with zero detected crossovers (Figure 3). Along every chromosome, at least one crossover hot spot was identified and these regions are often found flanking or near centromeres.

Previous studies have demonstrated an association between recombination hot and cold spots and GC content (Sun *et al.* 2012; Sun and Heitman 2016). For 7,558 inter-marker interval sequences within the 39 hot spots, the mean GC content was  $\sim 0.49$  (95% CI: [0.489, 0.494]) while the mean GC for 7,369 inter-marker interval sequences contained within the 44 cold spots was  $\sim 0.475$  (95% CI: [0.473, 0.477]). The mean GC content of hot spots differs significantly from the cold spots (Mann-Whitney U-test,  $p\text{-values} < 10^{-35}$ , Supplementary Figure S4). Both of these differ from the reported genome-wide average GC content (0.486) and the mean ( $\sim 0.483$ , 95% CI: [0.482, 0.484]) of the other 68,051 inter-marker interval sequences not associated with hot or cold spots (Sun *et al.* 2012). Of the 7,558 inter-marker interval sequences within identified hot spots, 584 detect a genotype change (ie the approximate sites of double

strand breaks) and of these inter-marker interval sequences, ~64.4% overlapped with intergenic regions when compared to the JEC21 annotation (Loftus *et al.* 2005).

From the set of 584 inter-marker interval sequences associated with hot spots and in which a crossover occurs, 100 random sequences were analyzed using MEME to identify sequence motifs associated with crossover hot spots. These sequences were compared to a control set of sequences selected in a similar fashion from other genomic regions. A poly(G) motif that is 29 bases long was identified in all of the 100 hot spot associated sequences (E-value <  $10^{-70}$ , Supplementary Figure S5).

#### Allele bias and allele distortion seen in segregants generated via bisexual reproduction in *C. deneoformans*

Across the 39 segregants from the  $\mathbf{a}\text{-}\alpha$  bisexual cross, a binomial model was used to identify chromosomal regions with bias towards one parental allele, using a null model of equal likelihood of inheriting either of the parental alleles ( $p = 0.50$ ). Five regions show evidence of biased allele inheritance towards the XL280a allele (q-value < 0.016). These regions are located on chromosomes one, two, four, six, and twelve with lengths of approximately 364, 260, 303, 41, and 60 kb respectively (Supplementary Figure S6). The allelic frequencies across SNP sites in segregants from the  $\alpha\text{-}\alpha$  unisexual cross do not show evidence of bias towards either parental allele that reaches genome-wide significance.

Allele inheritance patterns within basidia were then examined for segregants from the  $\mathbf{a}\text{-}\alpha$  bisexual cross. Of the 39 progeny from the  $\mathbf{a}\text{-}\alpha$  bisexual crosses, 22 may be grouped by basidia of dissection. This grouping method generates five groups for analysis with three ( $N = 2$ ), four ( $N = 2$ ), and eight ( $N = 1$ ) segregants, all with unique genotypes (Figure 4). Using these segregants, representing five unique basidia, 197 regions were identified across the genome with allelic ratios deviating from the expected 2:2 (allelic distortion). The size of these regions with allelic distortion ranged from a minimum of six bases to a maximum of 1.4 Mb (Supplementary Figure S7, A). The average size of regions exhibiting allelic distortion does not differ across chromosomes (ANOVA, p-value = 0.092). The locations of allelic distortion regions are often similar across basidia (Figure 4). Of the 197 allelic distortions, 83 were identified from basidia III, IV, and V with allele ratios consistent with possible gene conversions.

Across the 197 regions representing haplotypes with distorted parental allele frequencies, the specific allele inherited was examined. Along chromosome twelve, eleven haplotypes with distorted allele frequencies were identified, and ten of these retain the XL280a allele. Genome-wide, no evidence of consistent bias towards either parental genotype was observed (Supplementary Figure S7, B).

The average number of regions with distorted allele frequencies across the genome was established as a function of chromosome size for our 22 segregants representing 5 unique basidia from the  $\mathbf{a}\text{-}\alpha$  bisexual crosses (Supplementary Figure S8). A Log-Linear model provides evidence supporting a significant association between chromosome size and the average number of haplotypes with distorted allele frequencies (p-value <  $10^{-5}$ ).

#### Unique patterns of allele segregation

Two groups of segregants from the  $\mathbf{a}\text{-}\alpha$  bisexual crosses representing two unique basidia showed interesting patterns of al-

lele segregation. The first group of samples dissected from one basidium was comprised of eight spores and analysis of their recombinant haplotypes indicates all eight samples are genetically unique (for example see Figure 4, basidium IV). This observation deviates from the expected four unique gametes expected to result from meiosis (Kwon-Chung 1980; Page and Hawley 2003; Idnurm *et al.* 2005). The second basidium showing interesting allele segregation was composed of four segregants. These four samples are all recombinant and were previously thought to be genetically unique as indicated by marker genotypes along chromosome four (Sun *et al.* 2014). However, our re-analysis indicates that two of the four segregants are nearly genetically identical; chromosome four is the only distinct chromosome differentiating the two samples, which are identical along the other thirteen chromosomes, including a partial duplication of chromosome ten.

## Discussion

*C. deneoformans* is capable of sexual reproduction between strains of the opposite and the same mating types. In this study we document higher rates of recombination in offspring generated from bisexual crosses. Progeny from the bisexual cross are predicted to have a basal rate of ~1.30 crossovers per chromosome versus ~0.98 crossovers per chromosome for progeny in the unisexual cross. For both sets of progeny, the number of crossovers is predicted to increase by a ratio of ~1.768 per Mb increase in chromosome size. Of the fourteen chromosomes in the *C. deneoformans* genome, seven show differences in the average number of crossovers per segregant when comparing samples from  $\mathbf{a}\text{-}\alpha$  bisexual and  $\alpha\text{-}\alpha$  unisexual crosses. Converting these crossover rates, we estimate an approximate physical to genetic distance of 6.14 and 4.67 kb/cM for the  $\alpha\text{-}\alpha$  unisexual and  $\mathbf{a}\text{-}\alpha$  bisexual crosses, respectively. These estimates are nearly three times lower than the estimated crossover rate of *Saccharomyces cerevisiae* (~2 kb/cM, Cherry *et al.* (1997); Barton *et al.* (2008)) and far higher than the crossover rates estimated for *Drosophila melanogaster* (~100 kb/cM, Comeron *et al.* (2012)), *Arabidopsis thaliana* (~278 kb/cM, Salomé *et al.* (2012)), and *Homo sapiens* (~840 kb/cM, Kong *et al.* (2002)).

Our results differ from previous estimates because they are based on information from the entire *C. deneoformans* genome and utilize more than 200 fold higher density of markers than have been employed in any previous study of recombination in *C. deneoformans* (Forche *et al.* 2000; Marra *et al.* 2004; Sun *et al.* 2014). For example, relative to the earlier study of Sun *et al.* (2014), which utilized the same set of offspring, we detected differences in the average number of crossovers along chromosome four between progeny from  $\alpha\text{-}\alpha$  unisexual and  $\mathbf{a}\text{-}\alpha$  bisexual crosses. We reasoned that this difference was due to increases in the detected number of crossovers resulting from increased marker density. To confirm this, SNPs were selected to best approximate marker locations from Sun *et al.* (2014) such that the maximum difference in location between these SNPs and the previous marker location was one kilobase. Using these data to reconstruct haplotypes and calculate crossover events recapitulated the previous findings. Thus differences in observed recombination events along chromosome four, relative to a prior report that analyzed the same segregants, are due to increased marker density which facilitates the detection of genotype changes previously masked by double crossover events (Supplementary Figure S3).

The regression model used to relate chromosome length and

523 the number of crossovers predicts nearly one obligate crossover  
524 *on average* per chromosome for both sets of progeny from the  
525  $\alpha$ - $\alpha$  unisexual and **a**- $\alpha$  bisexual crosses (see [Results](#)). A signif-  
526 icant number of segregants had chromosomes that had zero  
527 detected crossovers (non-exchange chromosomes), but analysis  
528 of segregants from basidia groups suggests that the standard  
529 model of crossover assurance holds (i.e. there is at least one  
530 crossover per homologous chromosome pair per meiosis; [Ault  
531 and Nicklas \(1989\)](#)). The non-exchange chromosomes we ob-  
532 served may thus be due to Holiday junctions resolving into non-  
533 crossover events during chromosome disjunction or may reflect  
534 chromatids that weren't involved in crossovers during meiosis.

535 The analysis of crossover hot and cold spots identified at  
536 least one crossover hot spot along each of the fourteen chro-  
537 mosomes, and cold spots on every chromosome except 13 and  
538 14. Analyses based on a subset of the hot spot inter-marker in-  
539 terval sequences in which crossovers were detected, identified  
540 a poly(G) motif significantly enriched within these sequences.  
541 Furthermore, inter-marker interval sequences within crossover  
542 hot spots have on average higher GC content, as documented in  
543 other studies of *C. deneoformans* as well as other fungi ([Gerton  
544 et al. 2000](#); [Petes 2001](#); [Mancera et al. 2008](#); [Marsolier-Kergoat  
545 and Yeramian 2009](#); [Sun et al. 2012](#); [Sun and Heitman 2016](#)).  
546 Of the crossover hot spots, two were identified that flank the  
547 *MAT* locus, recapitulating the findings of several other studies  
548 ([Marra et al. 2004](#); [Hsueh et al. 2006](#); [Sun et al. 2012](#); [Sun and  
549 Heitman 2016](#)). While recombination hot spots flank the *MAT*  
550 locus, the *MAT* locus itself contains a crossover cold spot, con-  
551 sistent with previous findings ([Sun et al. 2014](#)). Parallel to the  
552 pattern observed at the *MAT* locus, we noted a tendency for  
553 centromeric regions and crossover cold spots tend to be sur-  
554 rounded by flanking crossover hot spots. Some caution is re-  
555 quired in interpreting the total number of hot and cold spots,  
556 and their precise locations. Due to the SNP and haplotype fil-  
557 tering criteria we employed, some genomic regions such as cen-  
558 tromeres and telomeres are excluded from analysis. Thus we  
559 are unable to access recombination or gene conversion events  
560 that could have taken place within centromeric regions, as sug-  
561 gested in previous studies of *Cryptococcus* ([Janbon et al. 2014](#);  
562 [Sun et al. 2017](#)) and other fungal species such as *Candida albi-*  
563 *cans* ([Thakur and Sanyal 2013](#)). The precise location of inferred  
564 hot and cold spots is also a function of the choice of bin widths  
565 and starting coordinates.

566 In addition to providing genome-wide information on  
567 crossover hot and cold spots, our analysis identified numerous  
568 regions that have allele ratios that deviate from the expected 2:2  
569 parental ratio in progeny from the **a**- $\alpha$  bisexual crosses, consis-  
570 tent with the findings of [Sun et al. \(2014\)](#) for chromosome four.  
571 Some of the regions with deviant allele frequencies have 3:1  
572 allele ratios which would be consistent with gene conversion,  
573 but most of the regions of allelic distortion are quite large, near-  
574 ing 100 kb. Thus it is unlikely that gene conversions alone ex-  
575 plain the observed loss of heterozygosity genome-wide, as con-  
576 version tracks from gene conversions are thought to be small,  
577 on the order of only a few kilobases as observed in *S. cerevisiae*  
578 ([Mancera et al. 2008](#)). Alternate models that could explain the  
579 observed allelic distortions include mitotic recombination that  
580 takes place after nuclear fusion but prior to meiosis, or chromo-  
581 somal mis-segregation that takes place during cell fusion prior  
582 to meiosis and formation of a basidium (leading to loss of a  
583 parental genotype). Chromosomal breakage prior to meiosis  
584 and then repair using the homologous chromosome could also

585 lead to a loss of one of the parental alleles ([Sun et al. 2014](#)).

586 Of the segregants from the **a**- $\alpha$  bisexual crosses, two groups  
587 are worth discussing in detail. The first group is comprised  
588 of four segregants from a single basidium. All four segre-  
589 gants were previously described as unique based on marker  
590 genotypes along chromosome four ([Sun et al. 2014](#)). However,  
591 genome-wide analysis revealed that two of the segregants are  
592 genetically identical except for chromosome four and are ane-  
593 uploid for chromosome ten. For this set of segregants the pat-  
594 terns of allele segregation could be explained by chromosomal  
595 non-disjunction. During the formation of the basidium and  
596 during meiosis, chromosomal non-disjunction could have pro-  
597 duced three nuclei, two with the correct ploidy of both chro-  
598 some four and ten and one nucleus with two unique, recom-  
599 binant copies of chromosome four. Such patterns have been  
600 observed in hybrid crosses between *C. neoformans* and *C. dene-*  
601 *oformans* ([Vogan et al. 2013](#)). During mitosis and basidiospore  
602 packaging, this aneuploid nucleus may have produced several  
603 copies of itself with varying arrangements of the genome, thus  
604 generating haplotypes genetically identical except for chromo-  
605 some four as seen in two of these segregants. The aneuploidy  
606 of the tenth chromosome in these segregants can be explained  
607 by the known aneuploidy of this chromosome in the parental  
608 strain XL280a ([Sun et al. 2012](#)). Another basidium from the **a**-  
609  $\alpha$  bisexual crosses that exhibited interesting patterns of allele  
610 segregation was a collection of eight segregants. Analysis of  
611 the haplotypes of these eight segregants indicates all are genet-  
612 ically unique. In this instance, fusion between sister haploid nu-  
613 clei could have taken place post meiosis within the basidium,  
614 providing opportunity for mitotic recombination to occur and,  
615 through subsequent rounds of mitosis, produce more than four  
616 unique gametes ([Vogan et al. 2013](#)). Due to the nature of *C. dene-*  
617 *oformans* and the methods of dissection, it is almost impossible  
618 to determine if crossover events occur during meiosis or mito-  
619 sis.

620 Our analyses provide evidence of different rates of recombi-  
621 nation in unisexual and bisexual crosses, however the mecha-  
622 nisms that drive such differences are as yet unknown. Could  
623 these differences be mating type specific? While the gene con-  
624 tents between the *MATa* and *MAT $\alpha$*  alleles are similar, mating  
625 type specific regulators such as the heterodimeric transcription  
626 factor *SXI1 $\alpha$ /SXI2a*, are known to regulate a variety of pro-  
627 cesses involved in diploid sexual development ([Hull et al. 2005](#);  
628 [Mead et al. 2015](#)). Here we postulate that the presence or ab-  
629 sence of mating type specific factors may change the regulation  
630 of genes critical for recombination, such as *DMC1* and *SPO11*  
631 ([Lin et al. 2005](#)), leading to higher or lower crossover rates dur-  
632 ing sexual reproduction.

633 In this report we have focused on a single species, and the  
634 extent to which the patterns and rates of recombination we  
635 document here for *C. deneoformans* hold across all *Cryptococcus*  
636 species and lineages is as yet unknown. Like *C. deneoformans*,  
637 in the VNI and VNII lineages of *C. neoformans* most isolates  
638 are of the *MAT $\alpha$*  mating type ([Kwon-Chung and Bennett 1978](#)).  
639 Only in populations of the VNBI and VNBII lineages are *MATa*  
640 strains found with significant frequency ([Litvintseva et al. 2003](#);  
641 [Desjardins et al. 2017](#)). This has led to the hypothesis that sexual  
642 reproduction in many *C. neoformans* lineages may be primarily  
643 unisexual ([Fu et al. 2015](#)). The differences in rates of recombina-  
644 tion we document here between **a**- $\alpha$  bisexual and  $\alpha$ - $\alpha$  unisexual  
645 matings may contribute to differences in population recombina-  
646 tion rates, even if **a**- $\alpha$  bisexual and  $\alpha$ - $\alpha$  unisexual matings occur



- at similar frequencies. Consistent with this idea, the analysis of Desjardins *et al.* (2017) indicates that linkage disequilibrium decays at a relatively similar rate in both VNB lineages (bisexual) and the VNI lineage (unisexual). However, the primarily unisexual VNI lineage shows an overall higher rate of linkage disequilibrium. New high resolution genomic data, both from crosses and from population studies (Desjardins *et al.* 2017; Rhodes *et al.* 2017), will help to clarify the relative contributions that sex, mitotic recombination (Vogan *et al.* 2013), hypermutation (Billmyre *et al.* 2017), and other mechanisms for generating genomic variation contribute to the origins and maintenance of genetic diversity within this clade of fungal pathogens.
- ### Acknowledgments
- This research was funded by the Research Training Grant from the University Program in Genetics and Genomics, Duke University, the Office of Biomedical Graduate Diversity's IMSD program, BioCoRE, NIH grants R56AI123502, R01AI133654, and R37AI39115-20. We would also like to thank Dr Debra Murray and Dr Selcan Aydin for comments and feedback on the manuscript.
- ### Author Contributions
- Conceived and designed the experiments: SS JH. Performed the experiments: SS. Analyzed the data: CR PMM. Contributed reagents and materials: SS RBB JH. Wrote the paper: CR PMM. Edited the paper: CR SS RBB JH PMM.
- ### Conflicts of Interest
- The authors have declared no known conflicts of interest.
- ### Literature Cited
- Ault, J. G. and R. B. Nicklas, 1989 Tension, microtubule rearrangements, and the proper distribution of chromosomes in mitosis. *Chromosoma* **98**: 33–39.
- Bailey, T. L., C. Elkan, *et al.*, 1994 Fitting a mixture model by expectation maximization to discover motifs in bipolymers. *Proceedings of the International Conference on Intelligent Systems for Molecular Biology* **2**: 28–36.
- Barton, A. B., M. R. Pecosz, R. S. Kurvathi, and D. B. Kaback, 2008 Meiotic recombination at the ends of chromosomes in *saccharomyces cerevisiae*. *Genetics* **179**: 1221–1235.
- Benjamini, Y. and D. Yekutieli, 2001 The control of the false discovery rate in multiple testing under dependency. *The Annals of Statistics* **29**: 1165–1188.
- Billmyre, R. B., S. A. Clancey, and J. Heitman, 2017 Natural mismatch repair mutations mediate phenotypic diversity and drug resistance in *Cryptococcus deuterogattii*. *elife* **6**: e28802.
- Bui, T., X. Lin, R. Malik, J. Heitman, and D. Carter, 2008 Isolates of *Cryptococcus neoformans* from infected animals reveal genetic exchange in unisexual,  $\alpha$  mating type populations. *Eukaryotic Cell* **7**: 1771–1780.
- Campbell, L. T., B. J. Currie, M. Krockenberger, R. Malik, W. Meyer, *et al.*, 2005 Clonality and recombination in genetically differentiated subgroups of *Cryptococcus gattii*. *Eukaryotic Cell* **4**: 1403–1409.
- Cherry, J. M., C. Ball, S. Weng, G. Juvik, R. Schmidt, *et al.*, 1997 Genetic and physical maps of *saccharomyces cerevisiae*. *Nature* **387**: 67.
- Coelho, C., A. L. Bocca, and A. Casadevall, 2014 The tools for virulence of *Cryptococcus neoformans*. *Advances in Applied Microbiology* **87**: 1–41.
- Comeron, J. M., R. Ratnappan, and S. Bailin, 2012 The many landscapes of recombination in *drosophila melanogaster*. *PLoS Genetics* **8**: e1002905.
- Desjardins, C. A., C. Giamberardino, S. M. Sykes, C.-H. Yu, J. L. Tenor, *et al.*, 2017 Population genomics and the evolution of virulence in the fungal pathogen *Cryptococcus neoformans*. *Genome Research* **27**: 1207–1219.
- Feretzi, M. and J. Heitman, 2013 Genetic circuits that govern bisexual and unisexual reproduction in *Cryptococcus neoformans*. *PLoS Genetics* **9**: e1003688.
- Forche, A., J. Xu, R. Vilgalys, and T. G. Mitchell, 2000 Development and characterization of a genetic linkage map of *Cryptococcus neoformans* var. *neoformans* using amplified fragment length polymorphisms and other markers. *Fungal Genetics and Biology* **31**: 189–203.
- Fu, C., S. Sun, R. B. Billmyre, K. C. Roach, and J. Heitman, 2015 Unisexual versus bisexual mating in *Cryptococcus neoformans*: Consequences and biological impacts. *Fungal Genetics and Biology* **78**: 65–75.
- Gerton, J. L., J. DeRisi, R. Shroff, M. Lichten, P. O. Brown, *et al.*, 2000 Global mapping of meiotic recombination hotspots and coldspots in the yeast *Saccharomyces cerevisiae*. *Proceedings of the National Academy of Sciences* **97**: 11383–11390.
- Giles, S. S., T. R. T. Dagenais, M. R. Botts, N. P. Keller, and C. M. Hull, 2009 Elucidating the pathogenesis of spores from the human fungal pathogen *Cryptococcus neoformans*. *Infection and Immunity* **77**: 3491–3500.
- Gyawali, R., Y. Zhao, J. Lin, Y. Fan, X. Xu, *et al.*, 2017 Pheromone independent unisexual development in *Cryptococcus neoformans*. *PLoS Genetics* **13**: e1006772.
- Hagen, F., K. Khayhan, B. Theelen, A. Kolecka, I. Polacheck, *et al.*, 2015 Recognition of seven species in the *Cryptococcus gattii*/*Cryptococcus neoformans* species complex. *Fungal Genetics and Biology* **78**: 16–48.
- Heitman, J., B. Allen, J. A. Alspaugh, and K. J. Kwon-Chung, 1999 On the origins of congenic *MAT $\alpha$*  and *MATa* strains of the pathogenic yeast *Cryptococcus neoformans*. *Fungal Genetics and Biology* **28**: 1–5.
- Holm, S., 1979 A simple sequentially rejective multiple test procedure. *Scandinavian Journal of Statistics* **6**: 65–70.
- Hsueh, Y.-P., A. Idnurm, and J. Heitman, 2006 Recombination hotspots flank the *Cryptococcus* mating-type locus: implications for the evolution of a fungal sex chromosome. *PLoS Genetics* **2**: e184.
- Hull, C. M., M.-J. Boily, and J. Heitman, 2005 Sex-specific homeodomain proteins *sxi1 $\alpha$*  and *sxi2a* coordinately regulate sexual development in *Cryptococcus neoformans*. *Eukaryotic Cell* **4**: 526–535.
- Hull, C. M., R. C. Davidson, and J. Heitman, 2002 Cell identity and sexual development in *Cryptococcus neoformans* are controlled by the mating-type-specific homeodomain protein *sxi1 $\alpha$* . *Genes and Development* **16**: 3046–3060.
- Idnurm, A., 2010 A tetrad analysis of the basidiomycete fungus *Cryptococcus neoformans*. *Genetics* **185**: 153–163.
- Idnurm, A., Y.-S. Bahn, K. Nielsen, X. Lin, J. A. Fraser, *et al.*, 2005 Deciphering the model pathogenic fungus *Cryptococcus neoformans*. *Nature Reviews Microbiology* **3**: 753–764.
- Janbon, G., K. L. Ormerod, D. Paulet, E. J. Byrnes III, V. Yadav, *et al.*, 2014 Analysis of the genome and transcriptome of *Cryp-*

- 764  *cryptococcus neoformans* var.  *grubii* reveals complex rna expression 826  
765 and microevolution leading to virulence attenuation. PLoS 827  
766 Genetics 10: e1004261. 828
- 767 Kong, A., D. F. Gudbjartsson, J. Sainz, G. M. Jonsdottir, S. A. 829  
768 Gudjonsson,  *et al.*, 2002 A high-resolution recombination 830  
769 map of the human genome. Nature Genetics 31. 831
- 770 Kwon-Chung, K. J., 1975 A new genus,  *filobasidiella*, the perfect 832  
771 state of  *Cryptococcus neoformans*. Mycologia 67: 1197–1200. 833
- 772 Kwon-Chung, K. J., 1976 A new species of  *Filobasidiella*, the sex- 834  
773 ual state of  *Cryptococcus neoformans* b and c serotypes. My- 835  
774 cologia 68: 943–946. 836
- 775 Kwon-Chung, K. J., 1980 Nuclear genotypes of spore chains in 837  
776  *Filobasidiella neoformans* ( *Cryptococcus neoformans*). Mycologia 838  
777 72: 418–422. 839
- 778 Kwon-Chung, K. J. and J. E. Bennett, 1978 Distribution of  $\alpha$  and 840  
779  $\alpha$  mating types of  *Cryptococcus neoformans* among natural and 841  
780 clinical isolates. American Journal of Epidemiology 108: 337– 842  
781 340. 843
- 782 Kwon-Chung, K. J., J. E. Bennett, B. L. Wickes, W. Meyer, C. A. 844  
783 Cuomo,  *et al.*, 2017 The case for adopting the “species com- 845  
784 plex” nomenclature for the etiologic agents of cryptococcosis. 846  
785 mSphere 2: e00357–16. 847
- 786 Lengeler, K. B., D. S. Fox, J. A. Fraser, A. Allen, K. Forrester, 848  
787  *et al.*, 2002 Mating-type locus of  *Cryptococcus neoformans*: a 849  
788 step in the evolution of sex chromosomes. Eukaryotic Cell 1: 850  
789 704–718. 851
- 790 Li, H., 2011 A statistical framework for snp calling, mutation 852  
791 discovery, association mapping and population genetical pa- 853  
792 rameter estimation from sequencing data. Bioinformatics 27: 854  
793 2987–2993. 855
- 794 Li, H. and R. Durbin, 2009 Fast and accurate short read align- 856  
795 ment with burrows-wheeler transform. Bioinformatics 25: 857  
796 1754–1760. 858
- 797 Lin, X., C. M. Hull, and J. Heitman, 2005 Sexual reproduction 859  
798 between partners of the same mating type in  *Cryptococcus ne-* 860  
799  *oformans*. Nature 434: 1017–1021. 861
- 800 Lin, X., A. P. Litvintseva, K. Nielsen, S. Patel, A. Floyd,  *et al.*, 862  
801 2007  $\alpha$ AD $\alpha$  hybrids of  *Cryptococcus neoformans*: evidence of 863  
802 same-sex mating in nature and hybrid fitness. PLoS Genetics 864  
803 3: 1975–1990. 865
- 804 Lin, X., S. Patel, A. P. Litvintseva, A. Floyd, T. G. Mitchell,  *et al.*, 866  
805 2009 Diploids in the  *Cryptococcus neoformans* serotype a pop- 867  
806 ulation homozygous for the  $\alpha$  mating type originate via uni- 868  
807 sexual mating. PLoS Pathogens 5: e1000283. 869
- 808 Litvintseva, A. P., R. E. Marra, K. Nielsen, J. Heitman, R. Vil- 870  
809 galys,  *et al.*, 2003 Evidence of sexual recombination among 871  
810  *Cryptococcus neoformans* serotype a isolates in sub-saharan 872  
811 africa. Eukaryotic Cell 2: 1162–1168. 873
- 812 Loftus, B. J., E. Fung, P. Roncaglia, D. Rowley, P. Amedeo,  *et al.*, 874  
813 2005 The genome of the basidiomycetous yeast and human 875  
814 pathogen  *Cryptococcus neoformans*. Science 307: 1321–1324. 876
- 815 Mancera, E., R. Bourgon, A. Brozzi, W. Huber, and L. M. Stein- 877  
816 metz, 2008 High-resolution mapping of meiotic crossovers 878  
817 and non-crossovers in yeast. Nature 454: 479–485. 879
- 818 Marra, R. E., J. C. Huang, E. Fung, K. Nielsen, J. Heitman,  *et al.*, 880  
819 2004 A genetic linkage map of  *Cryptococcus neoformans* variety 881  
820  *neoformans* serotype d ( *Filobasidiella neoformans*). Genetics 167: 882  
821 619–631. 883
- 822 Marsolier-Kergoat, M.-C. and E. Yeramian, 2009 Gc content and 884  
823 recombination: reassessing the causal effects for the  *Saccha-* 885  
824  *romyces cerevisiae* genome. Genetics 183: 31–38.
- 825 McKenna, A., M. Hanna, E. Banks, A. Sivachenko, K. Cibul-  
skis,  *et al.*, 2010 The genome analysis toolkit: a mapreduce  
framework for analyzing next-generation dna sequencing  
data. Genome Research 20: 1297–1303.
- Mead, M. E., B. C. Stanton, E. K. Kruzel, and C. M. Hull,  
2015 Targets of the sex inducer homeodomain proteins are re-  
quired for fungal development and virulence in  *Cryptococcus*  
 *neoformans*. Molecular Microbiology 95: 804–818.
- Nielsen, K., A. L. De Obaldia, and J. Heitman, 2007  *Cryptococ-*  
 *cus neoformans* mates on pigeon guano: implications for the  
realized ecological niche and globalization. Eukaryotic Cell  
6: 949–959.
- Page, S. L. and R. S. Hawley, 2003 Chromosome choreography:  
the meiotic ballet. Science 301: 785–789.
- Petes, T. D., 2001 Meiotic recombination hot spots and cold  
spots. Nat Rev Genet 2: 360–369.
- Rajasingham, R., R. M. Smith, B. J. Park, J. N. Jarvis, N. P. Govender,  
 *et al.*, 2017 Global burden of disease of hiv-associated  
cryptococcal meningitis: an updated analysis. The Lancet In-  
fectious Diseases 17: 873–881.
- Rhodes, J., C. A. Desjardins, S. M. Sykes, M. A. Beale, M. Van-  
hove,  *et al.*, 2017 Tracing genetic exchange and biogeography  
of  *Cryptococcus neoformans* var.  *grubii* at the global population  
level. Genetics 207: 327–346.
- Salomé, P., K. Bomblies, J. Fitz, R. Laitinen, N. Warthmann,  *et al.*,  
2012 The recombination landscape in arabidopsis thaliana f2  
populations. Heredity 108: 447–455.
- Sun, S., R. B. Billmyre, P. A. Mieczkowski, and J. Heitman,  
2014 Unisexual reproduction drives meiotic recombination  
and phenotypic and karyotypic plasticity in  *Cryptococcus ne-*  
 *oformans*. PLoS Genetics 10: e1004849.
- Sun, S. and J. Heitman, 2016 Running hot and cold: Recombina-  
tion around and within mating-type loci of fungi and other  
eukaryotes. In  *Environmental and Microbial Relationships*, pp.  
3–13, Springer.
- Sun, S., Y.-P. Hsueh, and J. Heitman, 2012 Gene conversion oc-  
curs within the mating-type locus of  *Cryptococcus neoformans*  
during sexual reproduction. PLoS Genetics 8: e1002810.
- Sun, S. and J. Xu, 2007 Genetic analyses of a hybrid cross be-  
tween serotypes a and d strains of the human pathogenic fun-  
gus  *Cryptococcus neoformans*. Genetics 177: 1475–1486.
- Sun, S., V. Yadav, R. B. Billmyre, C. A. Cuomo, M. Nowrou-  
sian,  *et al.*, 2017 Fungal genome and mating system transi-  
tions facilitated by chromosomal translocations involving in-  
tercentromeric recombination. PLoS Biology 15: e2002527.
- Thakur, J. and K. Sanyal, 2013 Efficient neocentromere for-  
mation is suppressed by gene conversion to maintain cen-  
tromere function at native physical chromosomal loci in  *Can-*  
 *dida albicans*. Genome Research 23: 638–652.
- Velagapudi, R., Y.-P. Hsueh, S. Geunes-Boyer, J. R. Wright, and  
J. Heitman, 2009 Spores as infectious propagules of  *Cryptococ-*  
 *cus neoformans*. Infection and Immunity 77: 4345–4355.
- Vogan, A. A., J. Khankhet, and J. Xu, 2013 Evidence for mitotic  
recombination within the basidia of a hybrid cross of  *Crypto-*  
 *coccus neoformans*. PLoS One 8: e62790.
- Xue, C., Y. Tada, X. Dong, and J. Heitman, 2007 The human  
fungal pathogen  *Cryptococcus* can complete its sexual cycle  
during a pathogenic association with plants. Cell Host and  
Microbe 1: 263–273.



884 **Figures**

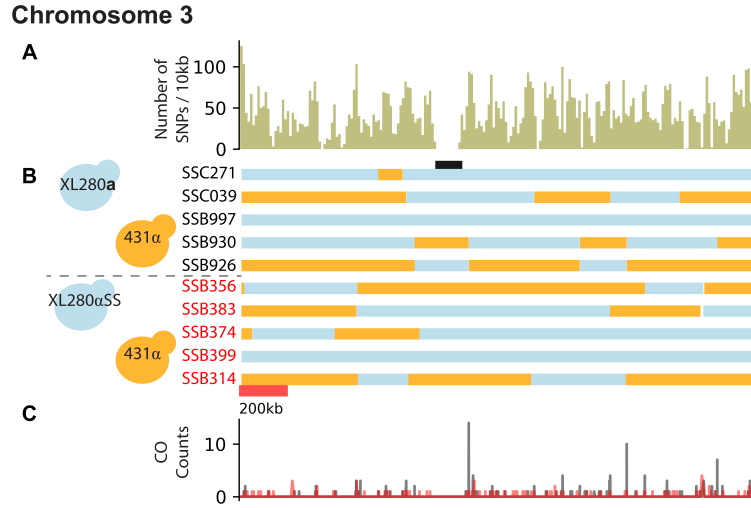

**Figure 1** SNP density, haplotypes, and crossover counts of chromosome three. A) The SNP density for chromosome three (length ~2.1 Mb) across the progeny from the XL280a  $\times$  431 $\alpha$  and XL280 $\alpha$ SS  $\times$  431 $\alpha$  crosses, calculated as the number of SNPs per 10 kb (total: 9,779 SNPs). B) Haplotypes, inferred from SNP data, are displayed as blue if inherited from XL280( $\alpha$ SS or a) or orange if inherited from 431 $\alpha$  for 10 segregants from the  $\alpha$ - $\alpha$  unisexual (red) and the a- $\alpha$  bisexual (black) crosses. The position of the centromere is displayed in black. C) Crossover (CO) counts along chromosome three for segregants from the  $\alpha$ - $\alpha$  unisexual (red) and the a- $\alpha$  bisexual (black) crosses. Crossovers are detected by changes in genotype between two contiguous SNPs.

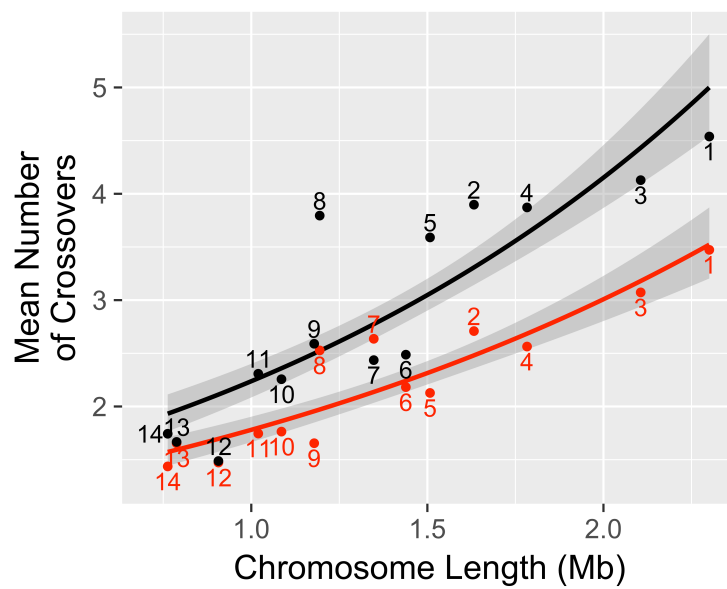

**Figure 2** Unisexual vs bisexual crossovers as a function of chromosome length. The average number of crossovers for progeny from the  $\alpha$ - $\alpha$  unisexual (red) and  $\mathbf{a}$ - $\alpha$  bisexual crosses (black) are shown per chromosome. Solid lines indicate the estimated Poisson regressions for the two cross types separately, relating the number of crossovers to chromosome lengths. Shaded regions are 95% confidence intervals of the regression estimates. Numbers indicate chromosomes.

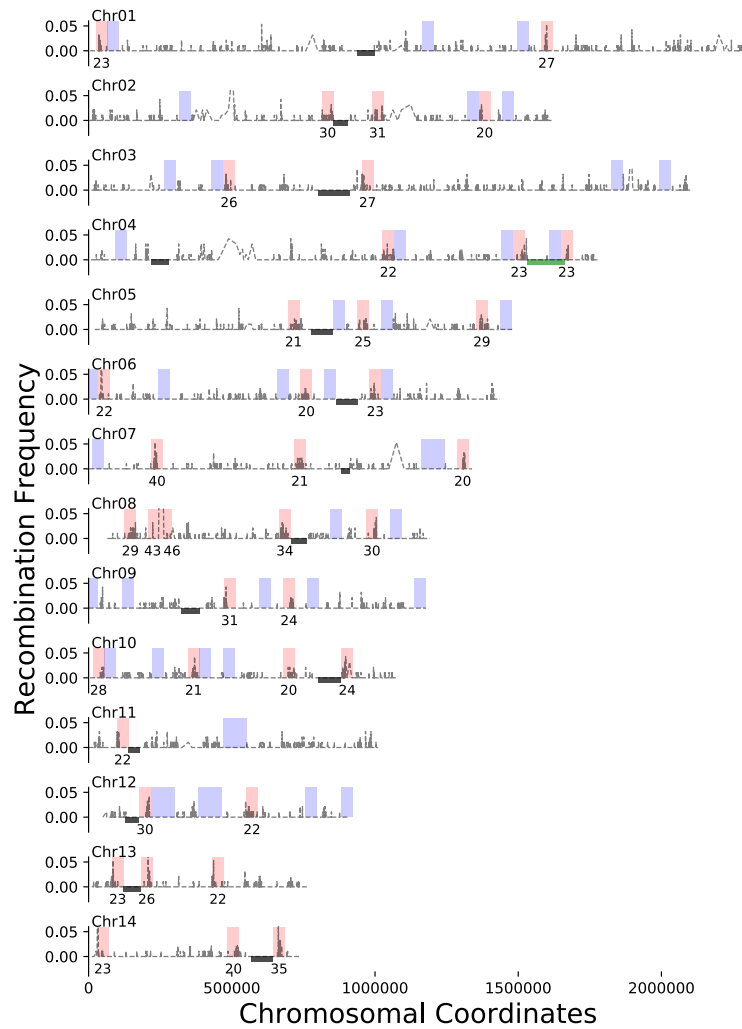

**Figure 3** Genome-wide crossover hot and cold spots. In grey, the recombination frequencies (y-axis) for segregants from the  $\alpha$ - $\alpha$  unisexual and  $a$ - $\alpha$  bisexual crosses along each of the fourteen chromosomes. Crossovers occur within an inter-marker interval and are detected as a change in genotype between consecutive SNPs. Bins, 41.5 kb wide, were used to segment each chromosome. For bins identified as crossover hot spots (red), the number of crossovers detected is labeled underneath. All crossover cold spots (blue) have zero detected crossovers. Locations of centromeres and the *MAT* locus are displayed as black bars and a green bar respectively. Note, the y-axis has been truncated in many instances to visualize crossovers along each chromosome.



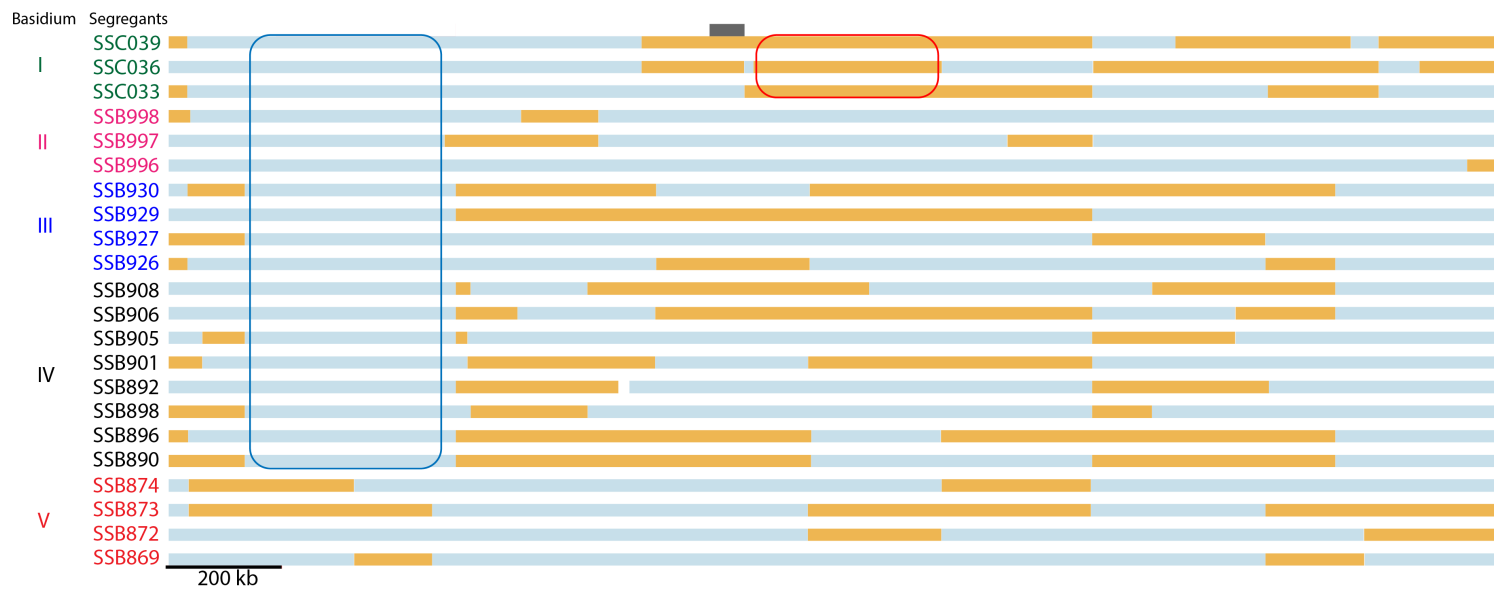

**Figure 4** Allelic distortions along chromosome one in segregants from  $a-\alpha$  bisexual crosses. Haplotypes (blue indicating inheritance from XL280a, orange from 431 $\alpha$ ) for 22 segregants from the  $a-\alpha$  bisexual crosses, grouped by basidium of dissection. Circled in red is a region, in a single basidium, exhibiting allelic distortion in the direction of 431 $\alpha$ . Circled in blue is a region that exhibits allelic distortion (towards XL280a) across multiple basidia. This second region overlaps with a region of allelic bias as determined from analysis of all progeny from the bisexual crosses. Other regions of allelic distortion are present in this figure. The position of the centromere is displayed as a black bar.

885 **Supplementary Figures**

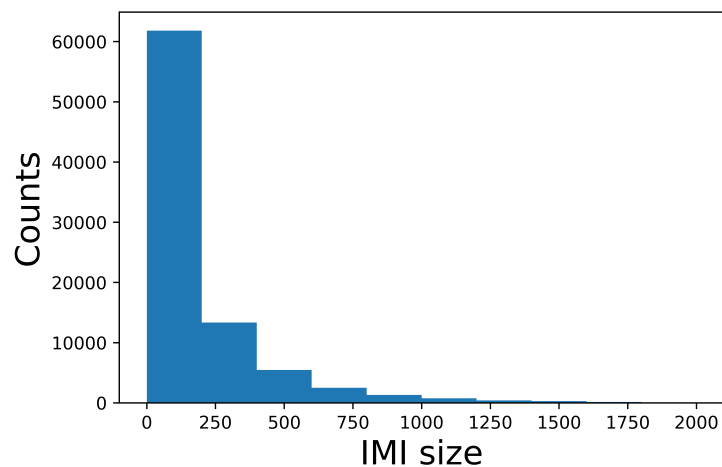

**Figure S1** Distribution of inter-marker interval size across progeny from the from the XL280a  $\times$  431 $\alpha$  and XL280 $\alpha$ SS  $\times$  431 $\alpha$  crosses. The total number of inter-marker intervals is 86,753. There are 86,278 inter-marker intervals with size  $<$  2 kb. Only 0.548% of the inter-marker intervals have a size greater than 2 kb (data not shown). The median inter-marker interval size is 87 bases.

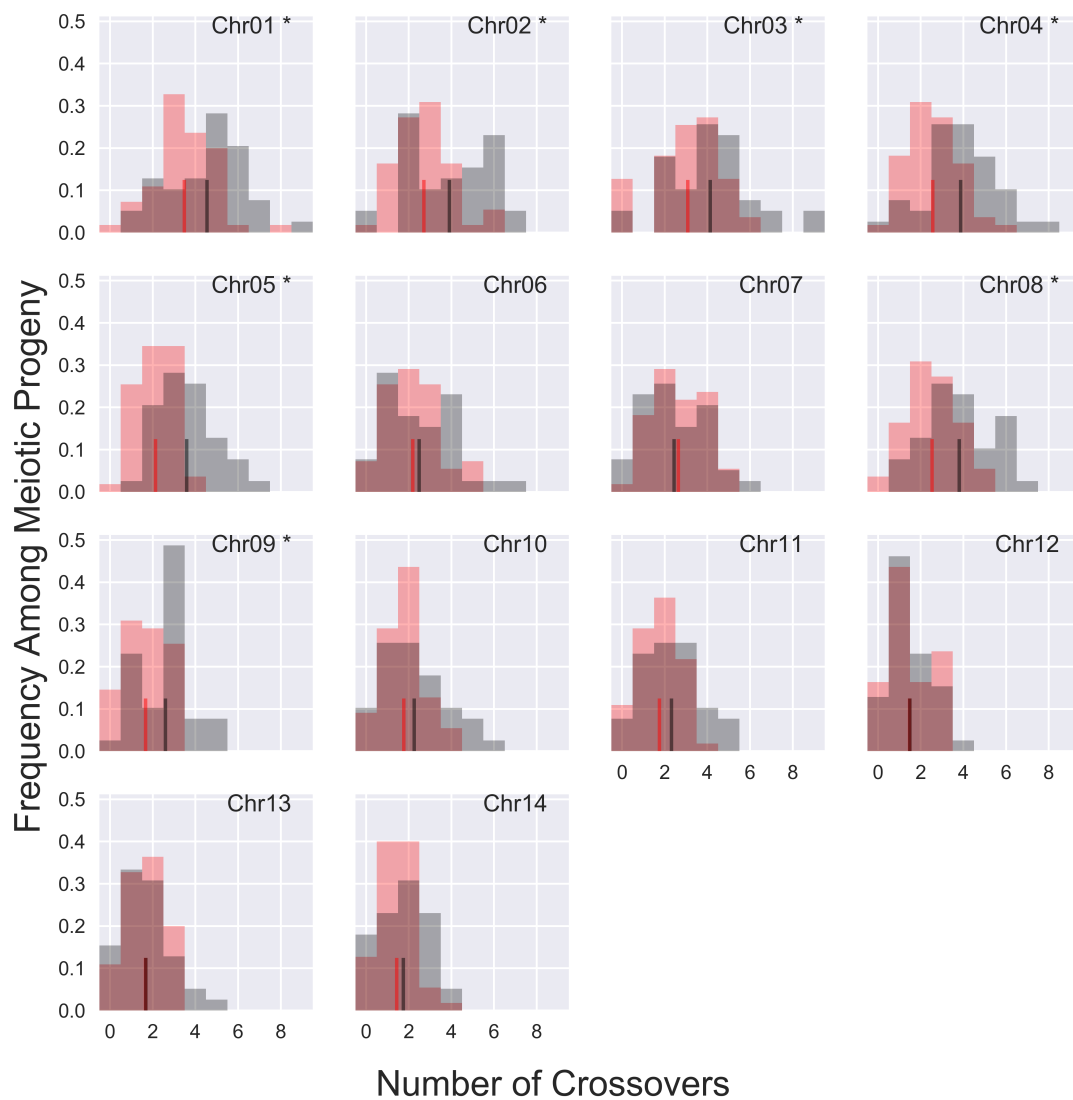

**Figure S2** Distributions of crossovers per chromosome. The means of each distribution are displayed as red and black vertical lines for the segregants from the unisexual and bisexual crosses, respectively. "\*" indicates chromosomes that show significant difference in the mean number of crossovers per segregant between progeny from the  $\alpha$ - $\alpha$  unisexual unisexual (red) and  $\alpha$ - $\alpha$  bisexual bisexual (black) crosses.



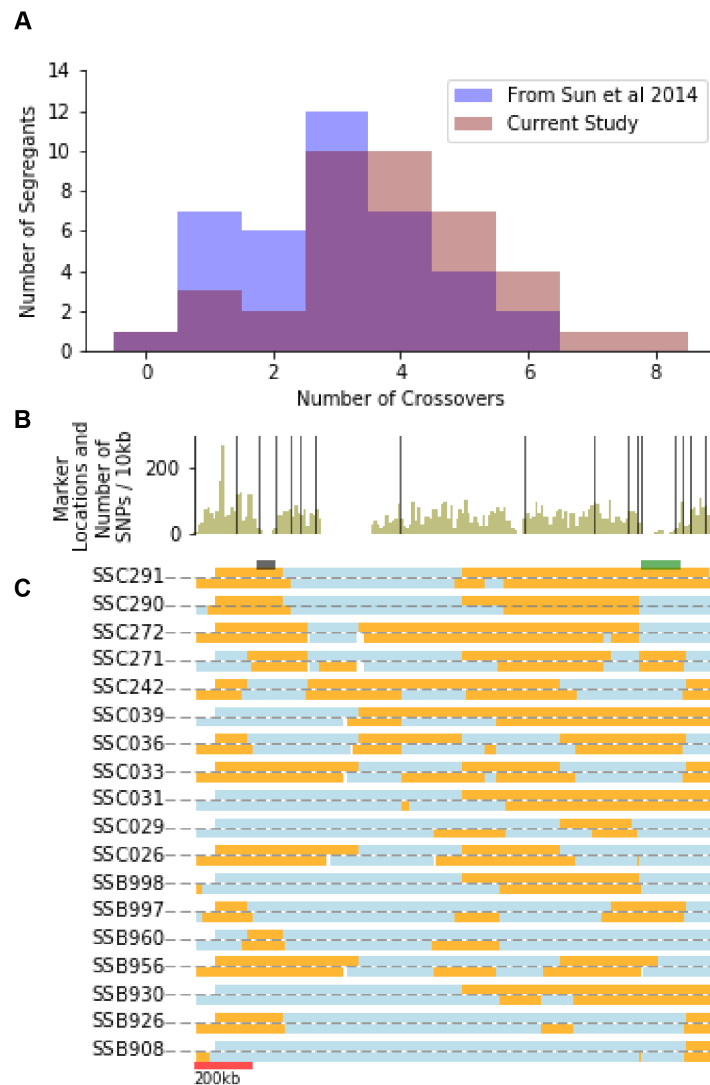

**Figure S3** Changes in detected crossover along chromosome four are due to increased marker density. A) Distributions of crossovers along chromosome four for segregants from the  $a-\alpha$  bisexual crosses. Recapitulated crossover counts from Sun *et al.* (2014) are shown in dark blue and current counts in red. B) Marker locations and SNP density across chromosome four. Locations of SNPs used to recapitulate results from Sun *et al.* (2014) are shown as solid black, vertical lines. The SNP density every 10 kb is shown in green. C) Inferred haplotypes from SNP data for segregants from the  $a-\alpha$  bisexual crosses with detected differences between the current study and Sun *et al.* (2014). For each segregant, the haplotype inferred from SNPs near marker locations used in Sun *et al.* (2014) (above grey line) and haplotypes from SNP data generated in this study (below grey line) are shown. Blue regions represent genetic material inherited from the XL280a parental strain. The approximate locations of the centromere and *MAT* locus are shown as black and green bars, respectively.

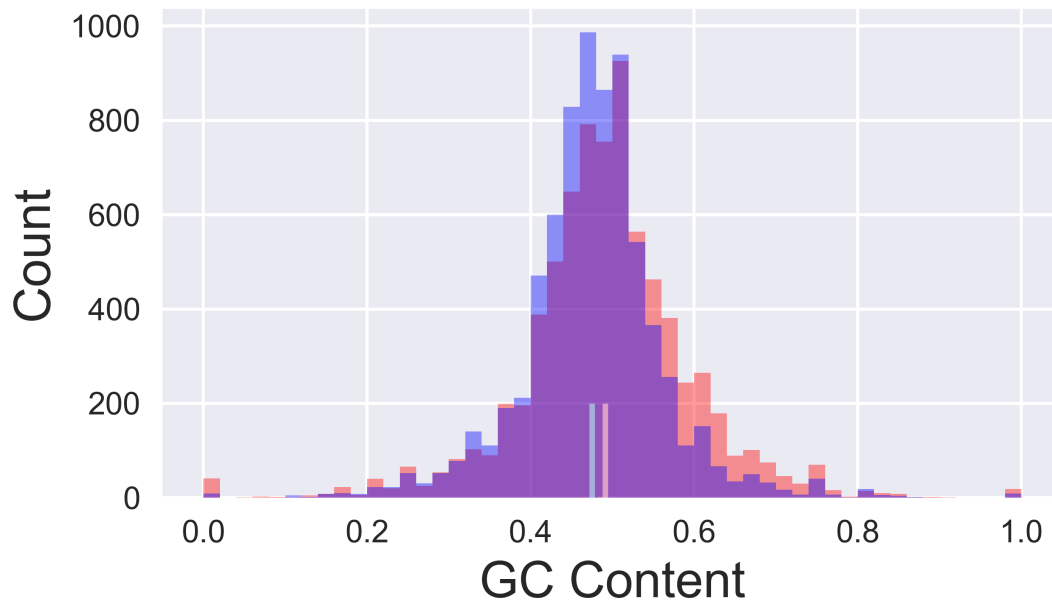

**Figure S4** Distributions of GC content for sequences associated with recombination hot (red) and cold (blue) spots. Vertical lines show mean GC content for sequences associated with recombination hot (red) and cold (blue) spots.





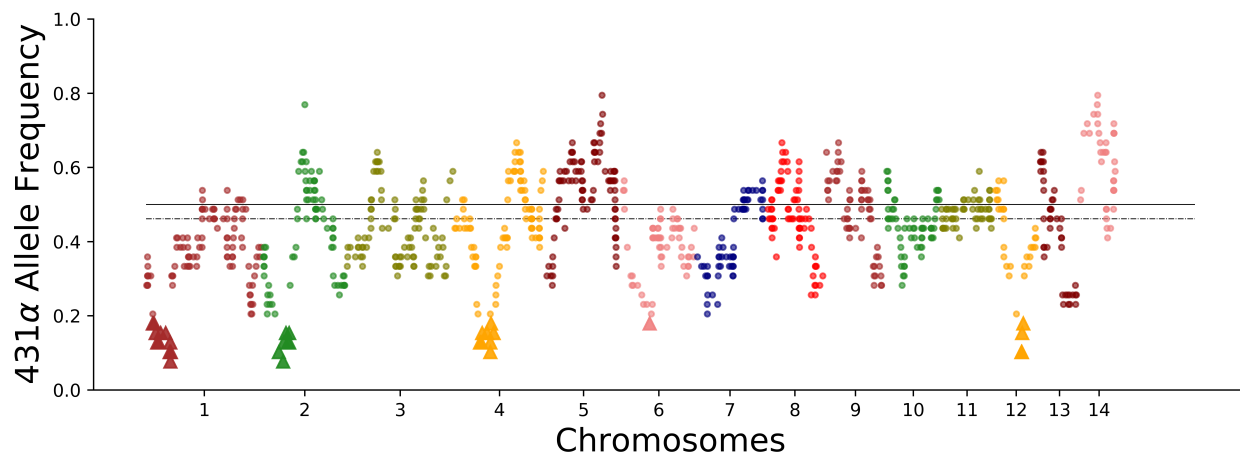

**Figure S6** Allele bias in segregants from bisexual crosses. The genome-wide frequencies of the 431 $\alpha$  parental allele in the 39 progeny from the  $\alpha$ - $\alpha$  bisexual crosses. Triangles denote five regions along chromosomes one, two, four, six, and twelve with lengths of  $\sim 364$ , 260, 303, 41, and 60 kb, respectively, biased towards the XL280 $\alpha$  parental allele. Solid and dashed lines indicate an allele frequency of 0.5 and the median, genome-wide allele frequency of 0.46, respectively.

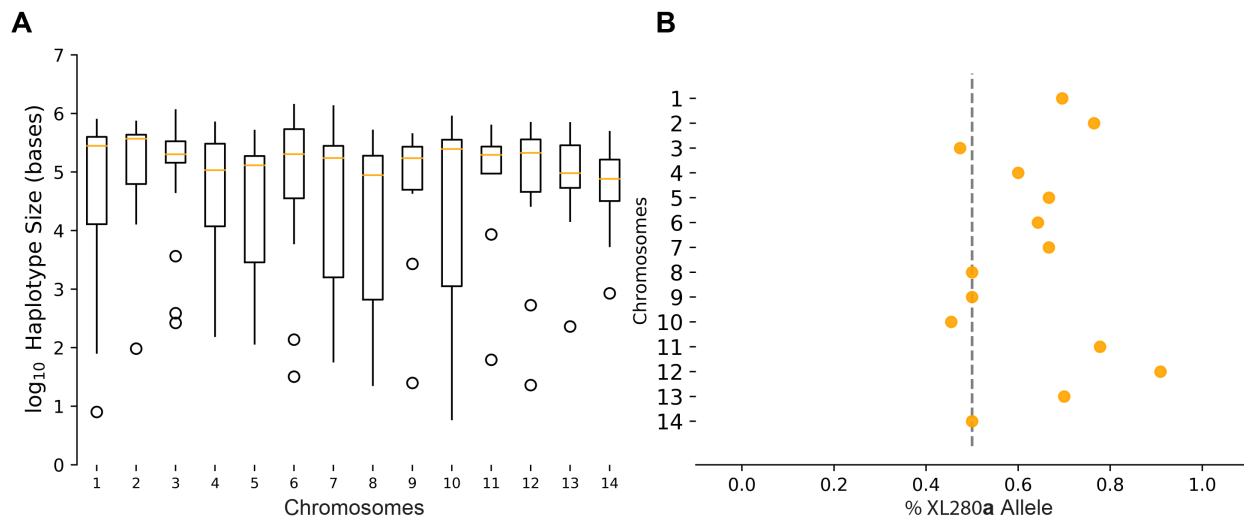

**Figure S7** Size of haplotypes deviating from the expected 2:2 parental allele ratio. A) the  $\log_{10}$  of haplotype size with distorted allele frequencies per chromosome. B) the percentage of haplotypes with distorted allele frequencies with the XL280a parental allele per chromosome.

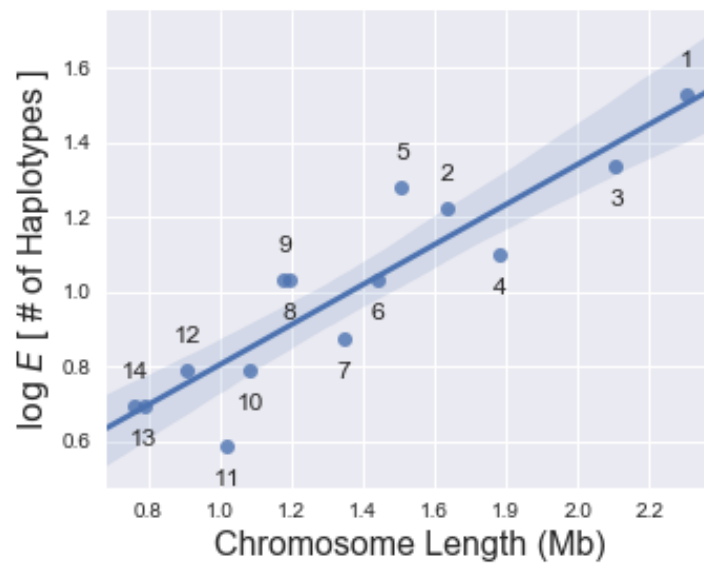

**Figure S8** Genome-wide analysis of distorted haplotypes. The log of the average number of haplotypes within a basidium with allele frequencies deviating from the expected 2:2 parental ratio as a function of chromosome length is shown. The blue line represents a log-linear model, shaded regions represent the 95% confidence interval for regression estimates. Numbers dictate chromosomes.
